# Supplementary material
Source: publisher figshare collection journal article supplement (https://sage.figshare.com/ndownloader/files/30778868)
Supplement: Supplementary file 1 [file 30778868]

Supplemental Table 1

*Codes Within Each Emergent Theme*

| Theme | Codes included |
| --- | --- |
| Academic | Academic skills, learning disabilities |
| Atypical behaviors | Chewing/licking non-food items, atypical behavior (general), repetitive behavior |
| Emotional or behavioral | Aggression, anger, anxiety, argumentative/defiant, behavior issues, bullied, crying, emotions, high energy/hyperactivity, impulsivity, obsessive behavior/interests, OCD, physical harm (general), physical self-harm, physical harm others, screaming, self-regulation |
| Cognition | Attention, cognition (general), inflexibility, memory |
| Communication | Communicate, expressive language, gestures, receptive language, repetitive language, respond to name, speech/language |
| Developmental | Developmental |
| Health | Other conditions, sleep |
| Life skills | Eating, life skills (general), safety, toileting |
| Motor skills | Fine motor, gross motor, motor skills (general) |
| Seeking diagnostic clarity or resources | Mention of ASD, seeking diagnostic clarity, seeking resources |
| Sensory | Food, sensory (general), sounds, texture |
| Social | Eye contact, friends, in own world, play skills, prefers being alone, social (general), social awareness, social communication, social skills |
| **ASD-specific themes** | |
| RRB | Inflexibility/transitions, obsessive behavior/interests, repetitive behavior, sensory, repetitive language |
| Social | Emotions, self-regulation, eye contact, friends, in own world, play skills, prefers being alone, social awareness, social skills, communicate, expressive language, gestures, receptive language, respond to name, speech/language |

Supplemental Table 2

*Multivariable Linear Regression Modeling Risk of ADOS-2 CSS Score Given Endorsement of Parental Concern ASD Specific Themes, Stratified by Child Race*

| ASD-specific Theme | Race | Beta | 95% CI |
| --- | --- | --- | --- |
| RRB | Asian | -0.37 | (-1.80 , 1.06) |
| RRB | Black/African-American | -0.30 | (-1.20 , 0.59) |
| RRB | Hispanic | 0.17 | (-1.98 , 2.32) |
| RRB | Multiracial/Other | -0.70 | (-1.88 , 0.49) |
| RRB | White | -0.49 | (-1.04 , 0.06) |
| Social Communication | Asian | -0.36 | (-2.14 , 1.42) |
| Social Communication | Black/African-American | 0.70 | (-0.30 , 1.70) |
| Social Communication | Hispanic | 5.26 | (1.63 , 8.88)* |
| Social Communication | Multiracial/Other | 1.02 | (-0.51 , 2.56) |
| Social Communication | White | -0.06 | (-0.71 , 0.58) |

*Note.* Table S2 shows Beta estimates and 95% confidence intervals for multivariable linear regression models estimating risk of ADOS-2 Calibrated Severity Score (CSS) given endorsement of parental concern ASD specific themes (restricted/repetitive behaviors or social communication). Models are stratified by child race/ethnicity and are adjusted for parental education, marital status, insurance, child age, and parental concern word count. **p* < .05. RRB = Restricted, repetitive, behavior. This table accompanies Figure 1.
